# Supplementary material
Source: PubMed Central journal article supplement (PMC2243236)
Supplement: NIHMS39632-supplement-supplement.pdf [file NIHMS39632-supplement-supplement.pdf]

SUPPLEMENTAL DATA

Genelists for strains HSF, HSF $\Delta$ NAD, and HSF $\Delta$ CAD

| HSF       | HSF $\Delta$ NAD | HSF $\Delta$ CAD |
|-----------|------------------|------------------|
| 442 genes | 329 genes        | 326 genes        |
| ALD1      | ALD1             | YAL063C          |
| YAL067C   | YAL044C          | YAL064C-A        |
| YAR031W   | YAL067C          | YAR023C          |
| YAR050W   | YAR050W          | YAR050W          |
| YBL049W   | YBL026W          | YBL026W          |
| YBL064C   | YBL033C          | YBL033C          |
| YBL075C   | YBL043W          | YBL075C          |
| YBL078C   | YBL064C          | YBL091C-A        |
| YBL091C-A | YBL075C          | YBL107C          |
| YBL101C   | YBL101C          | YBR033W          |
| YBR006W   | YBR026C          | YBR040W          |
| YBR045C   | YBR040W          | YBR045C          |
| YBR046C   | YBR045C          | YBR046C          |
| YBR047W   | YBR046C          | YBR053C          |
| YBR050C   | YBR047W          | YBR091C          |
| YBR052C   | YBR050C          | YBR137W          |
| YBR053C   | YBR052C          | YBR186W          |
| YBR054W   | YBR053C          | YBR201W          |
| YBR062C   | YBR062C          | YBR240C          |
| YBR072W   | YBR072W          | YBR258C          |
| YBR076W   | YBR117C          | YBR279W          |
| YBR085C-A | YBR132C          | YCL001W-A        |
| YBR090C   | YBR137W          | YCL040W          |
| YBR117C   | YBR139W          | YCL042W          |
| YBR137W   | YBR169C          | YCL044C          |
| YBR139W   | YBR170C          | YCL047C          |
| YBR169C   | YBR186W          | YCL048W          |
| YBR170C   | YBR201W          | YCL064C          |
| YBR173C   | YBR214W          | YCL066W          |
| YBR186W   | YBR219C          | YCR045C          |
| YBR201W   | YBR230C          | YCR068W          |
| YBR213W   | YBR241C          | YDL021W          |
| YBR214W   | YBR285W          | YDL022W          |
| YBR219C   | YBR294W          | YDL024C          |
| YBR240C   | YBR296C          | YDL027C          |
| YBR241C   | YCL001W-A        | YDL085W          |
| YBR284W   | YCL027W          | YDL093W          |
| YBR285W   | YCL040W          | YDL107W          |

|           |           |           |
|-----------|-----------|-----------|
| YBR294W   | YCL042W   | YDL110C   |
| YCL040W   | YCL044C   | YDL114W   |
| YCL042W   | YCL048W   | YDL124W   |
| YCL044C   | YCL057W   | YDL130W-A |
| YCL048W   | YCL064C   | YDL146W   |
| YCL057W   | YCL066W   | YDL169C   |
| YCL064C   | YCR018C   | YDL181W   |
| YCL066W   | YCR045C   | YDL193W   |
| YCR045C   | YCR076C   | YDL204W   |
| YCR061W   | YCR099C   | YDL211C   |
| YCR076C   | YDL021W   | YDL215C   |
| YCR099C   | YDL024C   | YDL223C   |
| YDL021W   | YDL027C   | YDL235C   |
| YDL024C   | YDL057W   | YDL247W   |
| YDL027C   | YDL085W   | YDR001C   |
| YDL057W   | YDL091C   | YDR019C   |
| YDL085W   | YDL110C   | YDR022C   |
| YDL091C   | YDL114W   | YDR026C   |
| YDL106C   | YDL119C   | YDR069C   |
| YDL110C   | YDL124W   | YDR070C   |
| YDL114W   | YDL130W   | YDR171W   |
| YDL119C   | YDL169C   | YDR179C   |
| YDL124W   | YDL181W   | YDR214W   |
| YDL130W-A | YDL193W   | YDR216W   |
| YDL169C   | YDL204W   | YDR218C   |
| YDL193W   | YDL214C   | YDR231C   |
| YDL199C   | YDL215C   | YDR236C   |
| YDL214C   | YDL222C   | YDR258C   |
| YDL215C   | YDL223C   | YDR320C   |
| YDL222C   | YDL235C   | YDR358W   |
| YDL223C   | YDR001C   | YDR374C   |
| YDR001C   | YDR018C   | YDR380W   |
| YDR018C   | YDR019C   | YDR400W   |
| YDR019C   | YDR022C   | YDR406W   |
| YDR022C   | YDR034W-B | YDR411C   |
| YDR030C   | YDR058C   | YDR503C   |
| YDR058C   | YDR059C   | YDR518W   |
| YDR059C   | YDR067C   | YDR528W   |
| YDR065W   | YDR171W   | YDR536W   |
| YDR070C   | YDR214W   | YDR540C   |
| YDR092W   | YDR216W   | YEL019C   |
| YDR171W   | YDR218C   | YEL041W   |
| YDR204W   | YDR231C   | YEL049W   |
| YDR214W   | YDR236C   | YER028C   |
| YDR216W   | YDR258C   | YER058W   |

|           |           |           |
|-----------|-----------|-----------|
| YDR218C   | YDR277C   | YER062C   |
| YDR221W   | YDR305C   | YER103W   |
| YDR222W   | YDR320C   | YER163C   |
| YDR231C   | YDR363W-A | YER173W   |
| YDR236C   | YDR380W   | YER179W   |
| YDR248C   | YDR400W   | YFL014W   |
| YDR258C   | YDR503C   | YFL016C   |
| YDR260C   | YDR518W   | YFL042C   |
| YDR285W   | YDR519W   | YFR026C   |
| YDR320C   | YDR536W   | YFR036W   |
| YDR330W   | YDR540C   | YFR041C   |
| YDR358W   | YEL012W   | YFR042W   |
| YDR363W-A | YEL019C   | YGL033W   |
| YDR374C   | YEL039C   | YGL037C   |
| YDR380W   | YEL071W   | YGL117W   |
| YDR394W   | YER037W   | YGL121C   |
| YDR403W   | YER044C-A | YGL126W   |
| YDR406W   | YER061C   | YGL127C   |
| YDR476C   | YER062C   | YGL138C   |
| YDR503C   | YER079W   | YGL156W   |
| YDR506C   | YER096W   | YGL158W   |
| YDR515W   | YER103W   | YGL170C   |
| YDR518W   | YER119C   | YGL184C   |
| YDR528W   | YER128W   | YGL250W   |
| YDR540C   | YER142C   | YGR008C   |
| YEL011W   | YER143W   | YGR028W   |
| YEL012W   | YER150W   | YGR032W   |
| YEL019C   | YER163C   | YGR066C   |
| YEL035C   | YER175C   | YGR142W   |
| YEL039C   | YER179W   | YGR144W   |
| YER004W   | YFL012W   | YGR244C   |
| YER033C   | YFL014W   | YGR255C   |
| YER045C   | YFL044C   | YGR256W   |
| YER054C   | YFR003C   | YGR258C   |
| YER061C   | YFR026C   | YHL006C   |
| YER062C   | YFR042W   | YHL012W   |
| YER079W   | YFR052W   | YHL022C   |
| YER103W   | YFR053C   | YHR043C   |
| YER119C   | YGL037C   | YHR079C-A |
| YER142C   | YGL047W   | YHR087W   |
| YER143W   | YGL053W   | YHR096C   |
| YER150W   | YGL062W   | YHR104W   |
| YER163C   | YGL104C   | YHR112C   |
| YER179W   | YGL117W   | YHR137W   |
| YFL012W   | YGL121C   | YHR140W   |

|         |           |           |
|---------|-----------|-----------|
| YFL014W | YGL126W   | YIL014C-A |
| YFL016C | YGL156W   | YIL037C   |
| YFL029C | YGL158W   | YIL072W   |
| YFL031W | YGL180W   | YIL099W   |
| YFL040W | YGL184C   | YIL101C   |
| YFL042C | YGL205W   | YIL108W   |
| YFL044C | YGL230C   | YIR007W   |
| YFL053W | YGL248W   | YJL003W   |
| YFL056C | YGL250W   | YJL031C   |
| YFL067W | YGL259W   | YJL053W   |
| YFR003C | YGR008C   | YJL056C   |
| YFR023W | YGR010W   | YJL057C   |
| YFR026C | YGR032W   | YJL058C   |
| YFR042W | YGR043C   | YJL066C   |
| YFR052W | YGR066C   | YJL073W   |
| YFR053C | YGR087C   | YJL074C   |
| YGL037C | YGR109C   | YJL144W   |
| YGL047W | YGR142W   | YJL153C   |
| YGL053W | YGR144W   | YJL168C   |
| YGL062W | YGR153W   | YJL213W   |
| YGL091C | YGR244C   | YJL216C   |
| YGL104C | YGR256W   | YJL219W   |
| YGL117W | YGR258C   | YJL221C   |
| YGL121C | YGR273C   | YJR021C   |
| YGL126W | YGR284C   | YJR022W   |
| YGL128C | YHL012W   | YJR043C   |
| YGL156W | YHL021C   | YJR048W   |
| YGL158W | YHL022C   | YJR054W   |
| YGL180W | YHL030W   | YJR078W   |
| YGL184C | YHR016C   | YJR079W   |
| YGL205W | YHR018C   | YJR095W   |
| YGL230C | YHR043C   | YJR096W   |
| YGL240W | YHR044C   | YJR106W   |
| YGL248W | YHR087W   | YJR107W   |
| YGL250W | YHR096C   | YJR119C   |
| YGL258W | YHR104W   | YJR151C   |
| YGL259W | YHR112C   | YJR156C   |
| YGR008C | YHR137W   | YJR158W   |
| YGR019W | YHR138C   | YJR159W   |
| YGR032W | YHR140W   | YKL022C   |
| YGR043C | YIL014C-A | YKL023W   |
| YGR048W | YIL023C   | YKL038W   |
| YGR052W | YIL037C   | YKL048C   |
| YGR066C | YIL072W   | YKL073W   |
| YGR087C | YIL099W   | YKL074C   |

|           |         |         |
|-----------|---------|---------|
| YGR088W   | YIL101C | YKL103C |
| YGR142W   | YIL102C | YKL107W |
| YGR154C   | YIL108W | YKL124W |
| YGR244C   | YIL155C | YKL165C |
| YGR248W   | YJL031C | YKL174C |
| YGR255C   | YJL034W | YKL201C |
| YGR256W   | YJL037W | YKL206C |
| YGR268C   | YJL038C | YKR011C |
| YGR284C   | YJL043W | YKR015C |
| YHL012W   | YJL045W | YKR041W |
| YHL021C   | YJL073W | YKR050W |
| YHL022C   | YJL089W | YKR061W |
| YHL024W   | YJL102W | YKR080W |
| YHL030W   | YJL116C | YKR101W |
| YHL036W   | YJL144W | YKR106W |
| YHR008C   | YJL153C | YLL009C |
| YHR012W   | YJL161W | YLL017W |
| YHR016C   | YJL213W | YLL026W |
| YHR043C   | YJL216C | YLL033W |
| YHR079C-A | YJL217W | YLL039C |
| YHR087W   | YJR073C | YLL057C |
| YHR096C   | YJR078W | YLR013W |
| YHR104W   | YJR079W | YLR030W |
| YHR112C   | YJR094C | YLR050C |
| YHR137W   | YJR095W | YLR054C |
| YHR138C   | YJR096W | YLR058C |
| YHR140W   | YJR099W | YLR080W |
| YHR156C   | YJR106W | YLR104W |
| YHR157W   | YJR119C | YLR125W |
| YHR160C   | YJR151C | YLR126C |
| YHR209W   | YJR156C | YLR148W |
| YIL013C   | YKL026C | YLR149C |
| YIL014C-A | YKL073W | YLR154C |
| YIL023C   | YKL103C | YLR178C |
| YIL037C   | YKL107W | YLR199C |
| YIL066C   | YKL124W | YLR207W |
| YIL072W   | YKL163W | YLR218C |
| YIL073C   | YKL165C | YLR251W |
| YIL099W   | YKL178C | YLR283W |
| YIL101C   | YKL206C | YLR292C |
| YIL108W   | YKL218C | YLR307W |
| YIL113W   | YKR011C | YLR308W |
| YIR028W   | YKR015C | YLR352W |
| YIR039C   | YKR080W | YLR408C |
| YJL020C   | YKR106W | YLR423C |

|         |         |         |
|---------|---------|---------|
| YJL031C | YLL026W | YLR424W |
| YJL037W | YLL039C | YLR438W |
| YJL042W | YLR001C | YLR445W |
| YJL045W | YLR013W | YLR457C |
| YJL053W | YLR030W | YML029W |
| YJL066C | YLR050C | YML083C |
| YJL068C | YLR058C | YML128C |
| YJL073W | YLR080W | YML130C |
| YJL074C | YLR104W | YMR013C |
| YJL089W | YLR149C | YMR017W |
| YJL102W | YLR174W | YMR022W |
| YJL116C | YLR178C | YMR028W |
| YJL144W | YLR199C | YMR040W |
| YJL153C | YLR216C | YMR090W |
| YJL161W | YLR267W | YMR094W |
| YJL164C | YLR284C | YMR095C |
| YJL168C | YLR307W | YMR096W |
| YJL172W | YLR327C | YMR112C |
| YJL216C | YLR345W | YMR118C |
| YJL219W | YLR356W | YMR120C |
| YJL221C | YLR423C | YMR133W |
| YJR008W | YLR438W | YMR154C |
| YJR022W | YML042W | YMR164C |
| YJR046W | YML066C | YMR173W |
| YJR078W | YML095C | YMR175W |
| YJR079W | YML128C | YMR180C |
| YJR091C | YML130C | YMR184W |
| YJR096W | YMR017W | YMR187C |
| YJR106W | YMR040W | YMR189W |
| YJR107W | YMR090W | YMR191W |
| YJR119C | YMR095C | YMR214W |
| YJR151C | YMR096W | YMR219W |
| YJR156C | YMR107W | YMR244W |
| YJR158W | YMR118C | YMR250W |
| YJR159W | YMR120C | YMR262W |
| YKL015W | YMR137C | YMR280C |
| YKL091C | YMR169C | YMR315W |
| YKL103C | YMR170C | YNL006W |
| YKL107W | YMR173W | YNL007C |
| YKL124W | YMR174C | YNL015W |
| YKL163W | YMR175W | YNL026W |
| YKL165C | YMR184W | YNL036W |
| YKL221W | YMR189W | YNL049C |
| YKR009C | YMR191W | YNL054W |
| YKR011C | YMR196W | YNL063W |

|         |         |         |
|---------|---------|---------|
| YKR046C | YMR214W | YNL092W |
| YKR076W | YMR244W | YNL111C |
| YKR080W | YMR250W | YNL133C |
| YKR097W | YMR271C | YNL194C |
| YKR106W | YMR280C | YNL202W |
| YLL005C | YMR303C | YNL204C |
| YLL019C | YMR315W | YNL249C |
| YLL026W | YMR322C | YNL274C |
| YLL039C | YNL007C | YNL294C |
| YLL057C | YNL009W | YNL310C |
| YLL058W | YNL015W | YNL333W |
| YLR030W | YNL036W | YNR026C |
| YLR054C | YNL049C | YOL013C |
| YLR064W | YNL092W | YOL023W |
| YLR070C | YNL115C | YOL031C |
| YLR080W | YNL117W | YOL055C |
| YLR104W | YNL133C | YOL060C |
| YLR125W | YNL155W | YOL071W |
| YLR126C | YNL194C | YOL084W |
| YLR149C | YNL202W | YOL117W |
| YLR154C | YNL281W | YOL148C |
| YLR164W | YNL318C | YOR037W |
| YLR178C | YNR001C | YOR068C |
| YLR199C | YNR069C | YOR077W |
| YLR205C | YNR075W | YOR099W |
| YLR207W | YOL031C | YOR173W |
| YLR216C | YOL047C | YOR174W |
| YLR233C | YOL048C | YOR176W |
| YLR234W | YOL055C | YOR185C |
| YLR251W | YOL082W | YOR208W |
| YLR267W | YOL084W | YOR236W |
| YLR284C | YOL088C | YOR250C |
| YLR307W | YOL117W | YOR288C |
| YLR324W | YOL119C | YOR289W |
| YLR327C | YOL131W | YOR292C |
| YLR345W | YOL152W | YOR321W |
| YLR356W | YOL162W | YOR336W |
| YLR387C | YOR027W | YOR339C |
| YLR423C | YOR100C | YOR347C |
| YLR438W | YOR161C | YOR365C |
| YLR445W | YOR173W | YOR381W |
| YLR457C | YOR185C | YOR388C |
| YML042W | YOR221C | YPL013C |
| YML047C | YOR288C | YPL027W |
| YML054C | YOR289W | YPL033C |

|         |         |         |
|---------|---------|---------|
| YML057W | YOR317W | YPL055C |
| YML100W | YOR321W | YPL108W |
| YML128C | YOR336W | YPL110C |
| YML130C | YOR339C | YPL111W |
| YMR017W | YOR347C | YPL123C |
| YMR020W | YOR374W | YPL161C |
| YMR040W | YPL021W | YPL201C |
| YMR067C | YPL027W | YPL222W |
| YMR085W | YPL054W | YPL240C |
| YMR090W | YPL113C | YPL247C |
| YMR094W | YPL123C | YPL258C |
| YMR095C | YPL240C | YPR006C |
| YMR096W | YPL253C | YPR054W |
| YMR110C | YPR002W | YPR078C |
| YMR118C | YPR006C | YPR079W |
| YMR120C | YPR007C | YPR151C |
| YMR133W | YPR030W | YPR156C |
| YMR139W | YPR078C | YPR193C |
| YMR154C | YPR151C |         |
| YMR169C | YPR160W |         |
| YMR170C | YPR193C |         |
| YMR173W |         |         |
| YMR174C |         |         |
| YMR175W |         |         |
| YMR180C |         |         |
| YMR184W |         |         |
| YMR187C |         |         |
| YMR189W |         |         |
| YMR191W |         |         |
| YMR196W |         |         |
| YMR201C |         |         |
| YMR214W |         |         |
| YMR250W |         |         |
| YMR262W |         |         |
| YMR271C |         |         |
| YMR275C |         |         |
| YMR280C |         |         |
| YMR304W |         |         |
| YMR315W |         |         |
| YNL006W |         |         |
| YNL007C |         |         |
| YNL015W |         |         |
| YNL036W |         |         |
| YNL063W |         |         |
| YNL092W |         |         |



|           |  |  |
|-----------|--|--|
| YNL094W   |  |  |
| YNL117W   |  |  |
| YNL146W   |  |  |
| YNL155W   |  |  |
| YNL194C   |  |  |
| YNL196C   |  |  |
| YNL202W   |  |  |
| YNL234W   |  |  |
| YNL237W   |  |  |
| YNL274C   |  |  |
| YNL277W   |  |  |
| YNL281W   |  |  |
| YNL305C   |  |  |
| YNL333W   |  |  |
| YNL335W   |  |  |
| YNR002C   |  |  |
| YNR068C   |  |  |
| YNR069C   |  |  |
| YOL013C   |  |  |
| YOL031C   |  |  |
| YOL038C-A |  |  |
| YOL038W   |  |  |
| YOL048C   |  |  |
| YOL055C   |  |  |
| YOL060C   |  |  |
| YOL071W   |  |  |
| YOL081W   |  |  |
| YOL082W   |  |  |
| YOL084W   |  |  |
| YOL117W   |  |  |
| YOL131W   |  |  |
| YOL151W   |  |  |
| YOL162W   |  |  |
| YOL163W   |  |  |
| YOL164W   |  |  |
| YOR007C   |  |  |
| YOR008C-A |  |  |
| YOR018W   |  |  |
| YOR020C   |  |  |
| YOR027W   |  |  |
| YOR040W   |  |  |
| YOR052C   |  |  |
| YOR059C   |  |  |
| YOR100C   |  |  |
| YOR120W   |  |  |

|         |  |  |
|---------|--|--|
| YOR134W |  |  |
| YOR161C |  |  |
| YOR185C |  |  |
| YOR190W |  |  |
| YOR288C |  |  |
| YOR289W |  |  |
| YOR317W |  |  |
| YOR321W |  |  |
| YOR336W |  |  |
| YOR347C |  |  |
| YOR349W |  |  |
| YOR374W |  |  |
| YOR382W |  |  |
| YOR386W |  |  |
| YOR387C |  |  |
| YPL021W |  |  |
| YPL027W |  |  |
| YPL033C |  |  |
| YPL054W |  |  |
| YPL110C |  |  |
| YPL113C |  |  |
| YPL119C |  |  |
| YPL123C |  |  |
| YPL170W |  |  |
| YPL200W |  |  |
| YPL222W |  |  |
| YPL223C |  |  |
| YPL230W |  |  |
| YPL240C |  |  |
| YPL247C |  |  |
| YPL253C |  |  |
| YPL270W |  |  |
| YPL276W |  |  |
| YPR001W |  |  |
| YPR002W |  |  |
| YPR015C |  |  |
| YPR026W |  |  |
| YPR030W |  |  |
| YPR078C |  |  |
| YPR081C |  |  |
| YPR151C |  |  |
| YPR154W |  |  |
| YPR160W |  |  |
| YPR193C |  |  |
